# Supplementary material for: DNA-binding directs the localization of a membrane-integrated receptor of the ToxR family
Source: PubMed Central journal article supplement (PMC6320335; doi:10.1038/s42003-018-0248-7), 2019-01-04
Supplement: 42003_2018_248_MOESM1_ESM.pdf [file 42003_2018_248_MOESM1_ESM.pdf]

## Supplementary Information

### Material and Methods

**Construction of strains and plasmids.** Molecular methods were carried out according to standard protocols or according to the manufacturer's instructions. Kits for the isolation of plasmids and the purification of PCR products were purchased from Süd-Laborbedarf (SLG; Gauting, Germany). Enzymes were purchased from New England BioLabs (Frankfurt, Germany). Bacterial strains and plasmids as well as primers used in this study are summarized in Supplementary Table 3 and Supplementary Data 1, respectively.

Marker-less in-frame deletion strain MG1655 $\Delta$ P<sub>cadBA</sub> (deletion of the *cadBA* promoter region, which includes the CadC-binding site) was constructed by Red<sup>®</sup>/ET<sup>®</sup> recombination using the *E. coli* Quick and Easy gene deletion kit (Gene Bridges, Heidelberg, Germany). Briefly, primers (PcadBA\_KO\_sense and PcadBA\_KO\_anti) were designed according to the manual. These primers target the surrounding of the promoter region of *cadBA* in order to amplify the FRT-PGK-gb2-neo-FRT template. Double stranded PCR fragment was introduced via electroporation into *E. coli* MG1655 according to the manual. Deletion of the *cadBA* promoter region was verified by colony PCR and sequencing using the primers PcadBA\_check\_sense and PcadBA\_check\_rev.

In order to gain strain *E. coli* MG1655 $\Delta$ P<sub>cadBA</sub>-P<sub>cadBA</sub>\_terminus, the *cadBA* promoter region was inserted at the terminus (33.7 minutes) in background of strain MG1655 $\Delta$ P<sub>cadBA</sub>. Briefly, the *cadBA* region was inserted between *gadC* and *gadB*. Therefore, DNA fragments comprising 650 bp of *gadC*, *gadB* and *cadBA* promoter, respectively, were amplified by PCR using MG1655 genomic DNA as template and the primer pairs *gadC*\_OL\_PcadBA\_rev and PcadBA\_OL\_*gadB*\_fwd, PcadBA\_OL\_*gadB*\_rev and *gadB*\_OL\_pNPTS\_rev, as well as pNPTS\_OL\_*gadC*\_fwd and *gadC*\_OL\_PcadBA\_fwd, respectively. After purification, these fragments were assembled via Gibson assembly<sup>1</sup> into EcoRV-digested pNPTS138-R6KT plasmid, resulting in the pNPTS138-R6KT-P<sub>cadBA</sub>\_terminus plasmid. The resulting plasmid was introduced into *E. coli* MG1655 by conjugative mating using *E. coli* WM3064 as a donor on LB medium containing DAP. Single-crossover integration mutants were selected on LB plates containing kanamycin but lacking DAP. Single colonies were then streaked out on LB plates containing 10% (wt/vol) sucrose but no NaCl to select for plasmid excision. Kanamycin-sensitive colonies were then checked for targeted insertion by colony PCR using primers

35 (*gadC\_check\_fwd* and *gadB\_check\_rev*) bracketing the location of the insertion and  
36 sequencing of the respective PCR fragment.

37 Construction of the marker-less in-frame deletion strain MG1655 $\Delta$ *lysP* strain was achieved  
38 using the suicide plasmid pNPTS138-R6KT- $\Delta$ *lysP*. Briefly, DNA fragments comprising 650  
39 bp upstream and downstream of *lysP*, respectively, were amplified by PCR using MG1655  
40 genomic DNA as template and the primer pairs pNPTS\_OL\_lysP\_us\_fwd and  
41 us\_lysP\_OL\_ds\_rev as well as us\_lysP\_OL\_ds\_fwd and lysP\_ds\_OL\_pNPTS\_rev,  
42 respectively. After purification, these fragments were assembled via Gibson assembly <sup>1</sup> into  
43 EcoRV-digested pNPTS138-R6KT plasmid, resulting in the pNPTS138-R6KT- $\Delta$ *lysP* plasmid.  
44 The resulting plasmid was introduced into *E. coli* MG1655 by conjugative mating using *E. coli*  
45 WM3064 as a donor as described above. However, in order to check for targeted deletion by  
46 colony PCR, the primers LysP\_check\_fwd2 and LysP\_check\_rev2 were used bracketing the  
47 location of the deletion, followed by sequencing of the respective PCR fragment.

48 In order to construct plasmid pET-mCherry-*cadC*, the mCherry gene was amplified by PCR,  
49 using pBR-Cherry <sup>2</sup> as template and primers Cherry\_NcoI\_fwd and Cherry\_NcoI\_rev, and  
50 cloned into plasmid pET16b-*cadC* using NcoI restriction site. Correct insertion of mCherry was  
51 verified by sequencing. However, introducing a linker of 22 amino acids between mCherry and  
52 CadC (amino acid sequence: M AGH HHH HHH HHH SSG HIE GRH).

53 In order to tag the variants CadC-D471N, CadC-E30R, CadC-R265Q/R268Q, CadC-R50A and  
54 CadC- $\Delta$ 108-151 with mCherry, plasmid pET-mCherry-*cadC* was digested with NdeI and  
55 HindIII and the backbone of 6130 bp was isolated. Simultaneously, plasmids pET-*cadC*-  
56 D471N, pET-*cadC*-E30R, pET-*cadC*-R265Q/R268Q, pET-*cadC*-R50A and pET16b-*cadC*-  
57  $\Delta$ 108-151 were digested with NdeI and HindIII and the fragments of 1830 bp were isolated and  
58 cloned into the digested pET-mCherry-*cadC* plasmid. Each plasmid was verified by  
59 sequencing.

60 For construction of the reporter plasmid pBBR1-MCS5-P<sub>*cadBA*</sub>-*lux*, 300 bp of the region  
61 upstream of *cadBA* was amplified by PCR using primers P*cadBA*\_XbaI\_fwd and  
62 P*cadBA*\_XmaI\_rev and MG1655 genomic DNA as template, and cloned into plasmid pBBR1-  
63 MCS5-TT-RBS-*lux* <sup>3</sup> using restriction sites XbaI and XmaI. Correct insertion was verified by  
64 sequence analysis using primer pNTPS\_Seq\_fwd.

65 For construction of the plasmid pET-mCherry, the 730 bp mCherry fragment amplified by PCR  
66 using primers fwd\_mCherry\_NcoI and rev\_mCherry\_BamHI and plasmid pBR322Cherry <sup>2</sup> as  
67 template and cloned into plasmid pET16b using restriction sites NcoI and BamHI. The final  
68 plasmid pET-mCherry was verified by sequencing using the primer pET16b\_down.

69 For single molecule microscopy, an *E. coli* MG1655 strain harboring chromosomally *mNG*-  
70 tagged *cadC* under control of its native promoter was constructed. In-frame insertion of *mNG*  
71 was achieved in *E. coli* MG1655 using the suicide plasmid pNPTS138-R6KT-*mNG-cadC*.  
72 Briefly, 500 bp upstream of *cadC* was amplified by PCR using MG1655 genomic DNA as  
73 template and the primer pairs CadC\_us\_EcoRI\_fwd and CadC\_us\_OL\_mNG\_rev. In order to  
74 amplify *mNeonGreen*, the primer CadC\_us\_OL\_mNG\_fwd and mNG\_OL\_ds\_CadC\_rev  
75 using the plasmid TCR361<sup>4</sup> as template (750 bp). Moreover, using primer  
76 mNG\_OL\_ds\_CadC\_fwd and CadC\_ds\_PspO\_rev and pET-mCherry-*cadC* as template, the  
77 second flanking region containing a short sequence of *cadC* gene and 22 codons for a linker  
78 (amino acids sequence: M AGH HHH HHH HHH SSG HIE GRH) was amplified (600 bp).  
79 Using overlap extension PCR, the three fragments were assembled via their homologous  
80 regions. The overlap PCR fragment of 1740 bp was cloned into plasmid pNPTS138-R6KT  
81 using EcoRI and PspOMI restriction sites resulting in the pNPTS-*mNG-cadC* plasmid. The  
82 resulting plasmid was introduced into *E. coli* MG1655 by conjugative mating using *E. coli*  
83 WM3064 as a donor as described above for the deletion of *lysP*, only with the exception that  
84 the primer cadC-check-fwd and cadC-check-rev were used to check kanamycin-sensitive  
85 colonies for targeted N-terminal insertion of mNeonGreen in frame with *cadC*.

86

87 **Measurement of CadC signal transduction activity in vivo.** *In vivo* signal transduction  
88 activity of mCherry-CadC wild type and different variants was probed with a luminescence-  
89 based reporter. Their ability to activate the  $P_{cadBA}$  promoter, which controls the *luxCDABE*  
90 expression, was tested under stress and non-stress conditions using luminescence as readout.  
91 Consequently, *E. coli* MG1655 carrying pET-mCherry-*cadC* or variants were co-transformed  
92 with the reporter plasmid pBBR1-MCS5- $P_{cadBA}$ -*lux*. These strains were incubated in KE  
93 medium pH 7.6 supplemented with the respective antibiotics overnight. As controls, *E. coli*  
94 MG1655 $\Delta cadC$  carrying plasmids pET16b-*cadC* and pBBR1-MCS5-TT-RBS-*lux* (promoter-  
95 less) and pET16b (empty plasmid) and pBBR1-MCS5- $P_{cadBA}$ -*lux*, respectively, were used and  
96 cultivated in KE medium pH 7.6 supplemented with the respective antibiotics overnight. The  
97 overnight cultures were adjusted to an OD<sub>600</sub> of 0.1 and were then aerobically cultivated in 96-  
98 well plates at 37 °C under four different conditions (KE medium pH 7.6; KE medium pH 7.6 +  
99 lysine; KE medium pH 5.8 or KE medium pH 5.8 + lysine) supplemented with the respective  
100 antibiotics. Bioluminescence and growth were determined every 15 min in the microtiter plates  
101 with a Tecan Infinite F500 system (Tecan, Crailsheim, Germany). Data are reported as relative  
102 light units (RLU) in counts per second per milliliter per OD<sub>600</sub>.

103 In order to analyze signal transduction activity of mNG-CadC *in vivo*, the strains MG1655 wild  
104 type or MG1655 mNG-CadC were transformed with the reporter plasmid pBBR1-MCS5-  
105  $P_{cadBA-lux}$  and treated as described above.

106

107 **Measurement of intracellular CadA activity.** Enzymatic activity of CadA in the *E. coli*  
108 strains LF1 and LF1\_Δ*cadC\_cadC*<sub>relocated</sub> was determined as described earlier <sup>5,6</sup>.

109

110 **Detection of mCherry-tagged CadC and variants via Western blot.** To control protein  
111 production of mCherry-tagged CadC and mCherry-tagged CadC variants, *E. coli* MG1655  
112 carrying pET-mCherry-*cadC* or its variants were grown to an OD<sub>600</sub> of 0.5 in LB supplemented  
113 with ampicillin. Overproduction of CadC and its variants was induced by adding 0.5 mM IPTG,  
114 and bacteria were harvested 2 h post-induction and then adjusted to OD<sub>600</sub> = 1. The proteins  
115 were fractionated by SDS-PAGE <sup>7</sup> on 12.5% acrylamide gels and transferred to a nitrocellulose  
116 membrane. Tagged proteins were labeled with primary polyclonal α-mCherry antibody  
117 (ThermoFischer, München, Germany) and the α-rabbit alkaline phosphatase-conjugated  
118 antibody (Rockland Immunochemicals, Hamburg, Germany) was used as the secondary  
119 antibody according to the manufacturer's recommendations. Localization of the secondary  
120 antibody was visualized using colorimetric detection of alkaline phosphatase activity with 5-  
121 Bromo-4-chloro-3-indolyl phosphate (BCIP) and nitro blue tetrazolium chloride (NBT). In  
122 order to verify the location of mCherry-CadC in different compartments of the cell, cells were  
123 disrupted by passage through a high-pressure cell disrupter (Constant Systems, Northants,  
124 United Kingdom) in ice-cold disruption buffer (50 mM Tris-HCl pH 7.5, 10 % (v/v) glycerol,  
125 10 mM MgCl<sub>2</sub>, 100 mM NaCl, 1 mM dithiotreitol, 0.5 mM PMSF and 0.03 mg ml<sup>-1</sup> DNase).  
126 After removal of intact cells and cell debris (= pellet) via centrifugation (9,000 x g, 30 min,  
127 4 °C), membrane vesicles were collected by ultracentrifugation at (45,000 x g, 60 min, 4 °C),  
128 whereas the pellet contained the membrane fraction and the supernatant the cytoplasm. These  
129 fractions were separated by SDS-PAGE and processed as described above. As ladder the  
130 PageRuler Prestained Protein Ladder (10 to 180 kDa, Thermo Fisher, München, Germany) was  
131 used.

132

133

134 **Supplementary Figures**

135

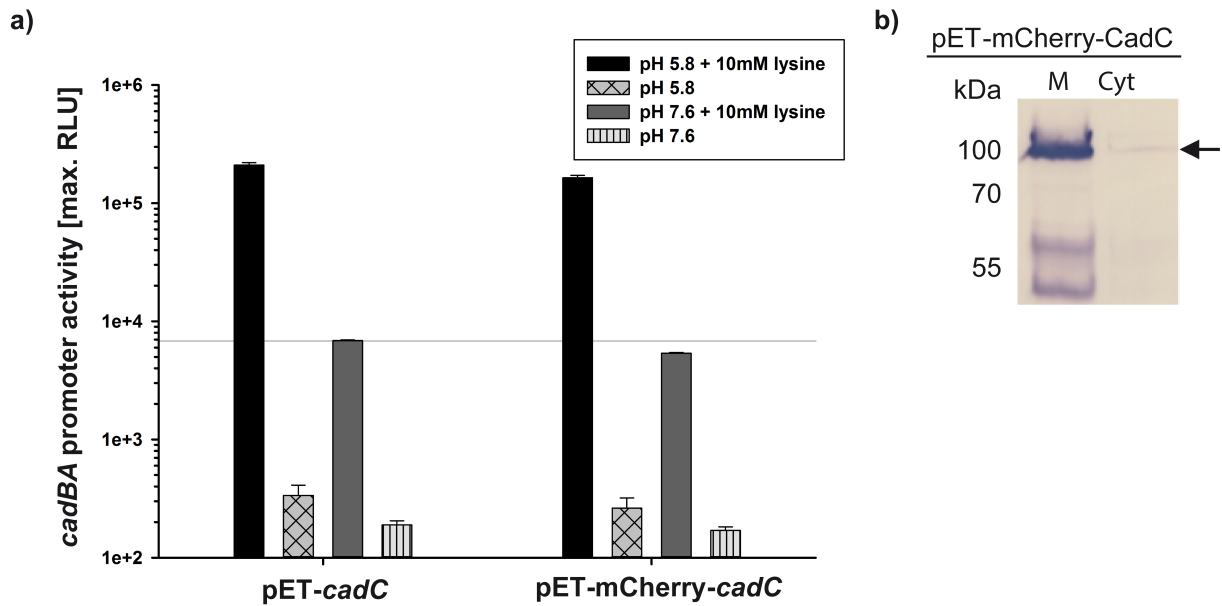

136

137

138 **Supplementary Figure 1: mCherry-CadC functions like wild type CadC.** (a) Functionality  
 139 of CadC was tested by measuring *cadBA* promoter activity using luminescence as read-out.  
 140 Assays were performed using *E. coli* MG1655 co-transformed with the reporter plasmids  
 141 pBBR1-MCS5-*P<sub>cadBA</sub>-lux* and either pET-*cadC* or pET-mCherry-*cadC* at different conditions.  
 142 Maximal relative light units (RLU) are shown. The grey line indicates the background level  
 143 measured for the reporter strain under non-stress conditions (pH 7.6 + lysine: 5,354 RLU). All  
 144 experiments were performed at least three times, and error bars represent standard deviation of  
 145 the means. Conditions: pH 5.8 + 10 mM lysine = black bars; pH 5.8 = light grey bars with  
 146 crossed lines; pH 7.6 + 10 mM lysine = dark grey bars; pH 7.6 = light grey bars with vertical  
 147 lines. (b) Western blot of mCherry-CadC in order to verify production and integration of  
 148 mCherry-CadC into the cytoplasmic membrane of *E. coli*. *E. coli* MG1655 cells transformed  
 149 with pET-mCherry-*cadC* was fractionated into membranes and cytoplasm, and mCherry-CadC  
 150 was detected after SDS-PAGE and Western blotting using  $\alpha$ -mCherry antibodies. Black arrow  
 151 indicates mCherry-CadC full-length protein with a size of 92 kDa. M = membrane fraction, Cyt  
 152 = cytoplasm.

153

154

155

156

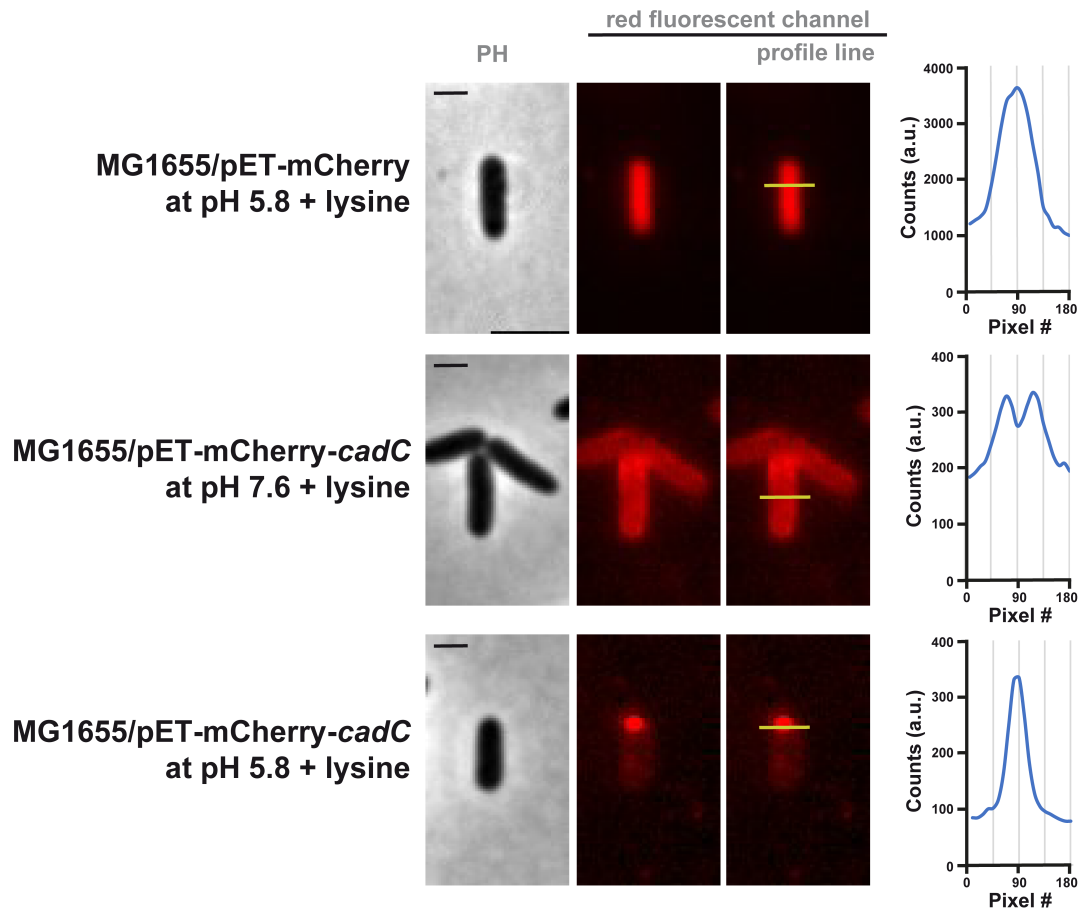

158

159

160 **Supplementary Figure 2: Comparison of the intensity profile of mCherry versus**  
 161 **mCherry-CadC under stress and non-stress conditions.** Graphs on the right side present the  
 162 intensity profiles of mCherry or mCherry-CadC along the yellow line shown in the red  
 163 fluorescent images by ImageJ<sup>8</sup>. Microscopy images on the left-hand side illustrate the phase  
 164 contrast (PH) and red fluorescent channel of the cells. Scale bar = 2 $\mu$ m.

165

166

167

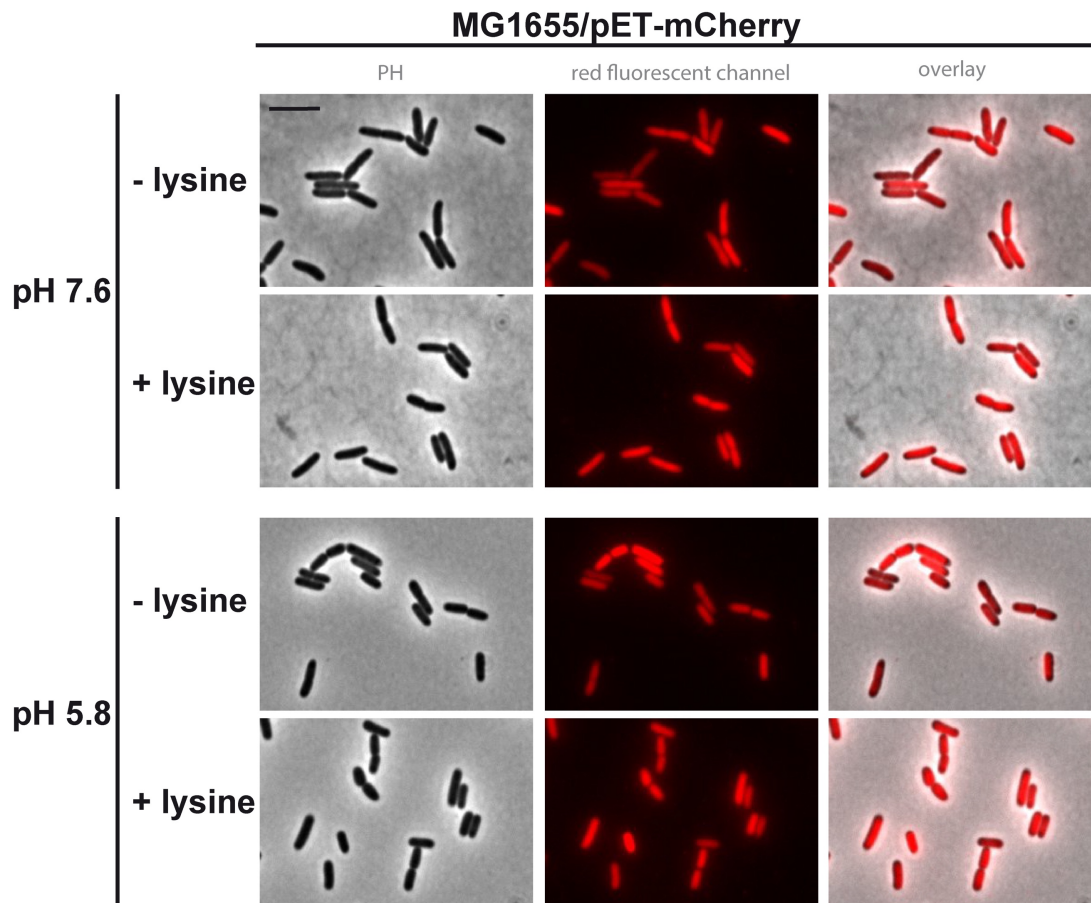

168

169 **Supplementary Figure 3: Localization of mCherry under stress and non-stress conditions.**

170 Fluorescent microscopy images of *E. coli*/pET-mCherry cells grown in minimal medium

171 (glucose as carbon source) buffered at pH 7.6 or pH 5.8, each supplemented with lysine. Images

172 were taken 60 min after exposure to the different conditions. PH = phase contrast, scale bar =

173 5  $\mu$ m.

174

175

176

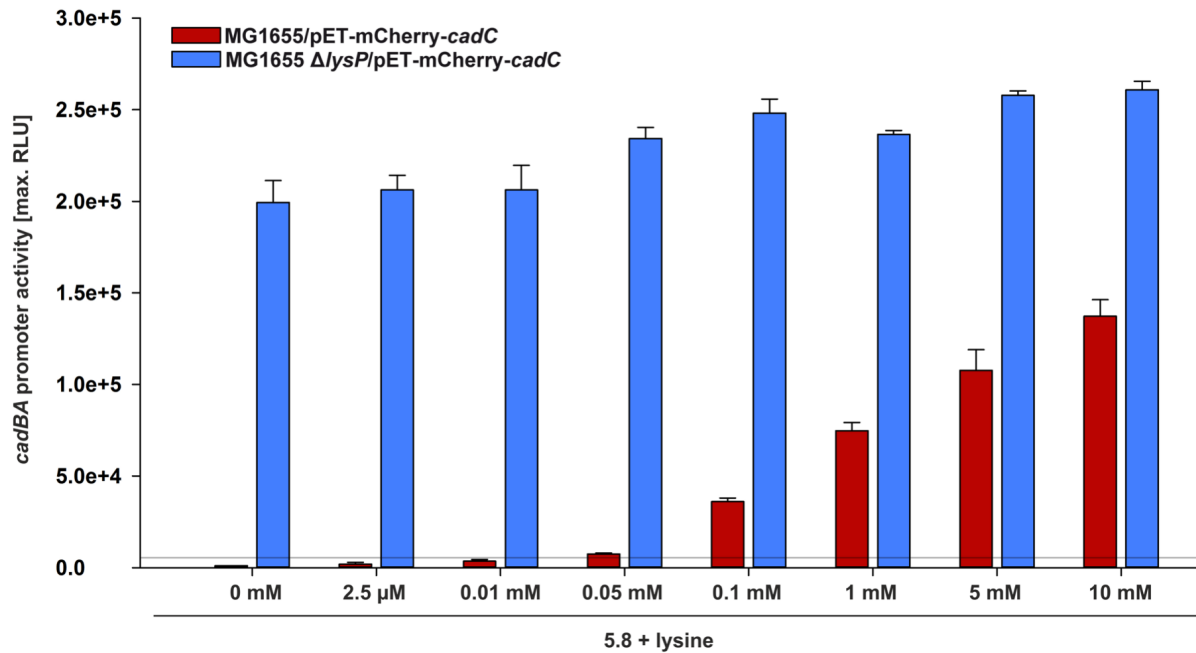

177

178

179 **Supplementary Figure 4: Influence of external lysine and the co-sensor LysP on *cadBA***  
180 **promoter activation.** *E. coli* MG1655 wild type and the isogenic *lysP* mutant (each co-  
181 transformed with plasmids pBBR1-MCS5-P<sub>*cadBA-lux*</sub> and pET-mCherry-*cadC*) were grown in  
182 medium at pH 5.8 with different external lysine concentrations. The grey line indicates the  
183 background level measured for the reporter strain under non-stress conditions (pH 7.6 + lysine:  
184 5,354 RLU). Reporter assays were performed as described in Supplementary Figure 1.

185



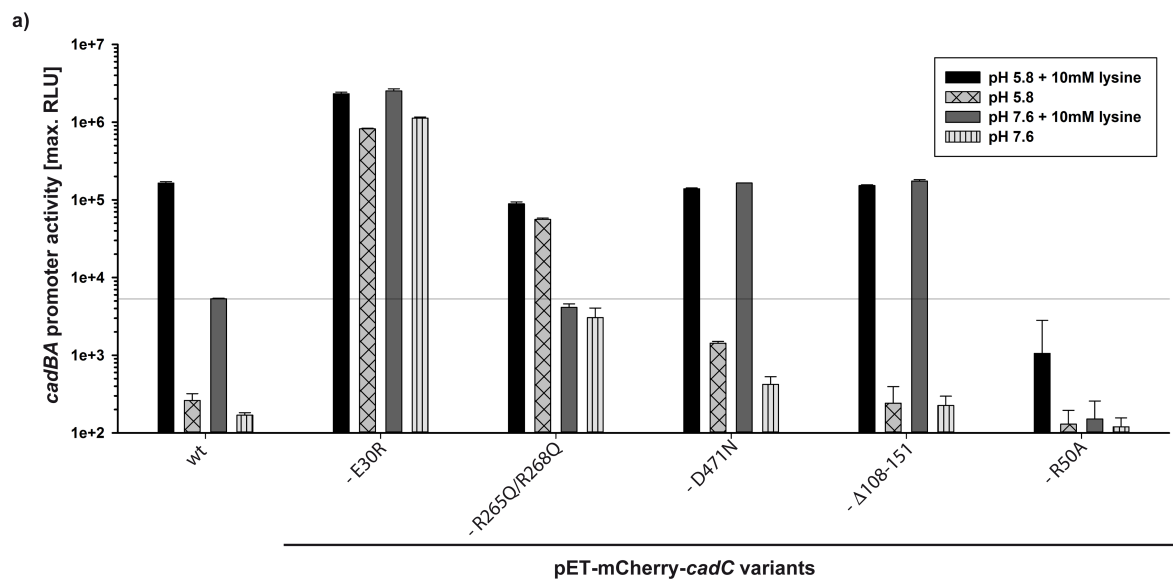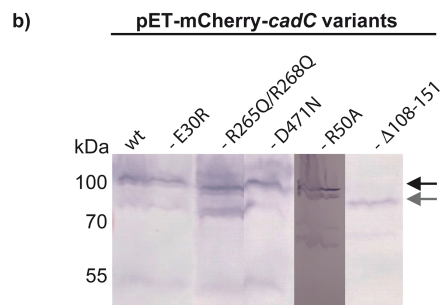

187

188

189 **Supplementary Figure 5: Altered stress response of CadC variants.** (a) Attachment of  
 190 mCherry did not alter the behavior of the previously characterized CadC variants: CadC-E30R  
 191 <sup>9</sup>, CadC-R265Q/R268Q <sup>10</sup>, CadC-D471N <sup>11</sup>, CadC-Δ108-151 <sup>12</sup> or CadC-R50A <sup>9</sup>; CadC wild  
 192 type for comparison. Conditions: pH 5.8 + 10 mM lysine = black bars; pH 5.8 = light grey bars  
 193 with crossed lines; pH 7.6 + 10 mM lysine = dark grey bars; pH 7.6 = light grey bars with  
 194 vertical lines. The grey line indicates the background level measured for the reporter strain  
 195 under non-stress conditions (pH 7.6 + lysine: 5,354 RLU). Reporter assays were performed as  
 196 described in Supplementary Figure 1. (b) Western blot of mCherry-CadC variants in order to  
 197 verify production and integration of mCherry-CadC into the cytoplasmic membrane of *E. coli*.  
 198 Arrows indicates mCherry-CadC variants with a size of 92 kDa (black) and mCherry-  
 199 CadCΔ108-151 with a size of 87 kDa (grey).

200

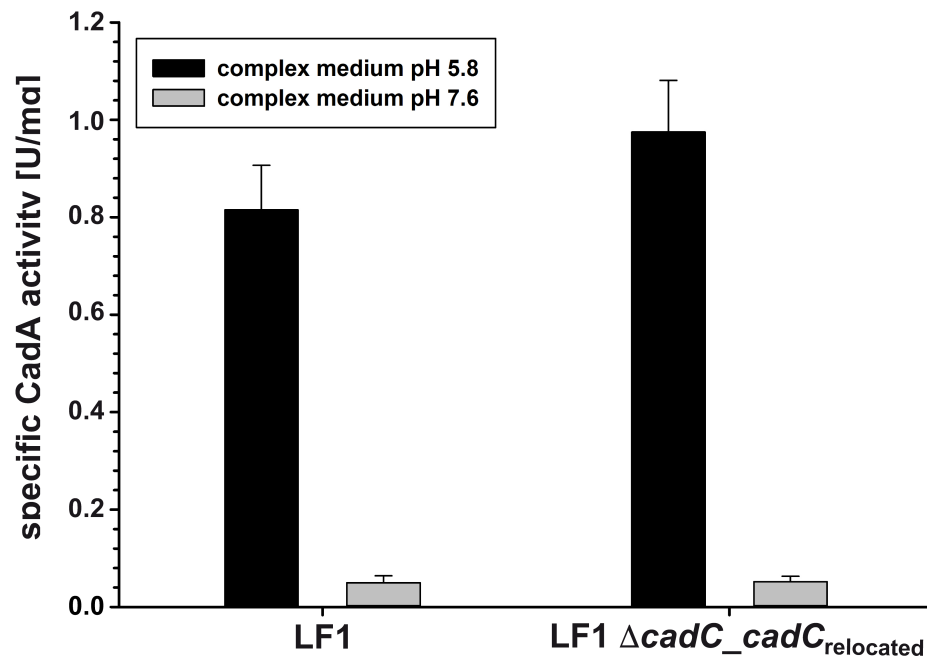

202

203

204 **Supplementary Figure 6: Chromosomal re-localization of the *cadC* gene does not affect**  
205 **CadA activity.** Specific CadA activity was determined in *E. coli* LF1 and  
206 LF1\_ $\Delta cadC\_cadC_{relocated}$  (relocation of *cadC* within the *lac* operon; native *cadC* is deleted) as  
207 described earlier <sup>5,6</sup>. Cells were cultivated in complex medium (LB) either at pH 5.8 (black  
208 bars) or pH 7.6 (grey bars).

209

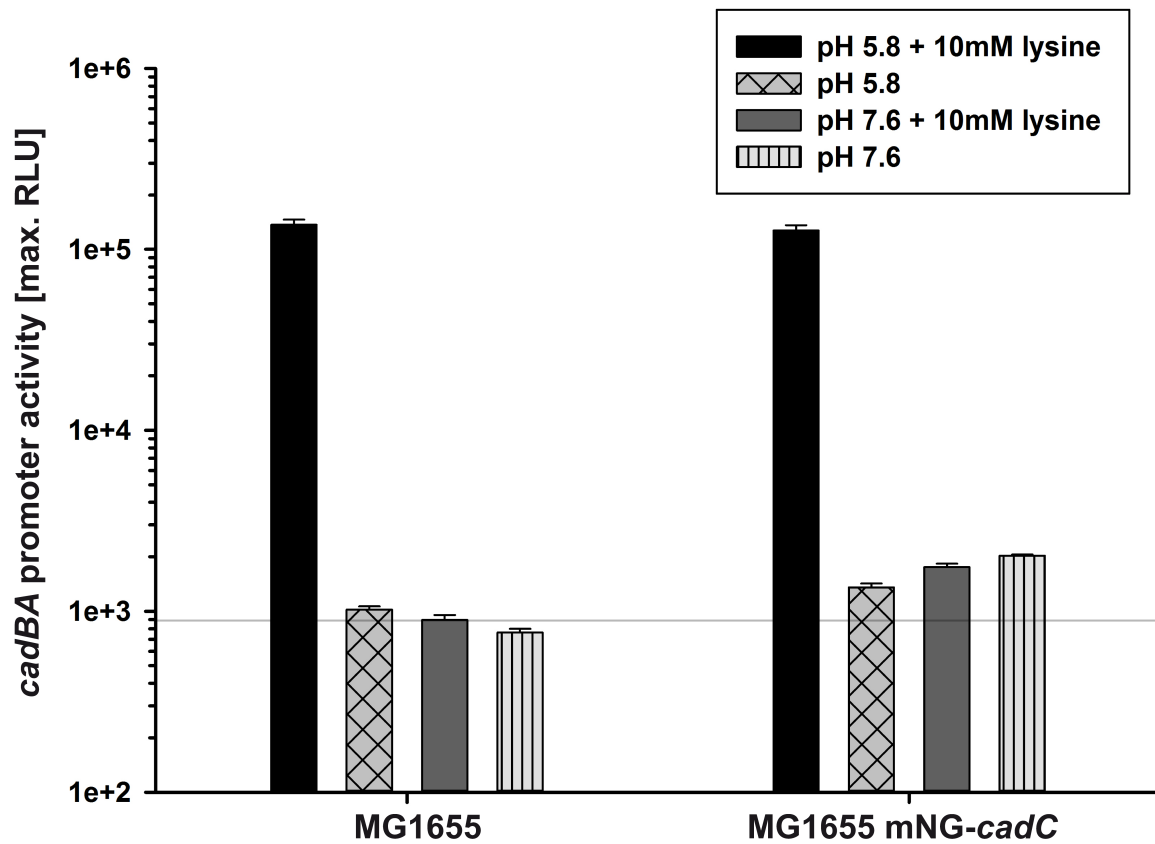

211

212

213 **Supplementary Figure 7: Chromosomally integrated mNG-CadC functions like wild type**

214 **CadC.** Reporter assays were performed using *E. coli* strains MG1655 and MG1655 mNG-

215 CadC, each transformed with the reporter plasmid pBBR1-MCS5- $P_{cadBA}$ -lux. Conditions: pH

216 5.8 + 10 mM lysine = black bars; pH 5.8 = light grey bars with crossed lines; pH 7.6 + 10 mM

217 lysine = dark grey bars; pH 7.6 = light grey bars with vertical lines. The grey line indicates the

218 background level measured for the reporter strain under non-stress conditions (pH 7.6 + lysine:

219 855 RLU). Reporter assays were performed as described in Supplementary Figure 1.

220

221 **Supplementary Table 1: Summary of percentage of cells with mCherry-CadC cluster(s)**  
 222 **in different strains and under various conditions.** For each strain or mCherry-CadC variant  
 223 at least 150 cells per condition were analyzed of three independent experiments. Standard  
 224 deviation was calculated of the means of the biological triplicates.

| <b>% of cells with mCherry-CadC cluster(s)<br/>at pH 5.8 at various lysine concentrations</b>                    |                             |                            |                             |                           |                        |                  |
|------------------------------------------------------------------------------------------------------------------|-----------------------------|----------------------------|-----------------------------|---------------------------|------------------------|------------------|
| <b><i>E. coli</i> strain</b>                                                                                     | <b>+ 10 mM lysine</b>       | <b>+ 5 mM lysine</b>       | <b>+ 1 mM lysine</b>        | <b>+ 100 μM lysine</b>    | <b>+ 2.5 μM lysine</b> | <b>no lysine</b> |
| MG1655                                                                                                           | 99.3 ± 0.7                  | 92.5 ± 1.9                 | 85.9 ± 5.7                  | 9.9 ± 2.2                 | 1.1 ± 0.4              | 0                |
| MG1655 $\Delta$ lysP                                                                                             | 92.2 ± 5.7                  | 82.2 ± 4.3                 | 63.1 ± 3.2                  | 64.2 ± 1.2                | 55.9 ± 3.7             | 70.4 ± 4.9       |
| <b>% of cells with mCherry-CadC cluster(s)<br/>at pH 5.8 + 10 mM lysine at various cadaverine concentrations</b> |                             |                            |                             |                           |                        |                  |
| <b><i>E. coli</i> strain</b>                                                                                     | <b>+ 1 mM cadaverine</b>    | <b>+ 320 μM cadaverine</b> | <b>+ 150 μM cadaverine</b>  | <b>+ 80 μM cadaverine</b> | <b>no cadaverine</b>   |                  |
| MG1655                                                                                                           | 0                           | 32.5 ± 3.7                 | 80.6 ± 1.8                  | 97.4 ± 2.3                | 98.9 ± 0.4             |                  |
| <b>% of cells with cluster(s) of CadC-mCherry variants<br/>under various conditions</b>                          |                             |                            |                             |                           |                        |                  |
| <b>CadC</b>                                                                                                      | <b>pH 5.8 + 10mM lysine</b> | <b>pH 5.8</b>              | <b>pH 7.6 + 10mM lysine</b> | <b>pH 7.6</b>             |                        |                  |
| CadC                                                                                                             | 99.3 ± 0.7                  | 0                          | 0.5 ± 0.4                   | 0                         |                        |                  |
| CadC-D471N                                                                                                       | 72.6 ± 1.8                  | 0.2 ± 0.4                  | 80.8 ± 4.0                  | 0                         |                        |                  |
| CadC-R265Q/R268Q                                                                                                 | 81.7 ± 4.7                  | 72.5 ± 3.1                 | 0                           | 0                         |                        |                  |
| CadC- $\Delta$ 108-151                                                                                           | 99.1 ± 0.4                  | 2.2 ± 0.4                  | 98.3 ± 0.9                  | 0.9 ± 0.4                 |                        |                  |
| CadC-E30R                                                                                                        | 82.5 ± 2.0 *                | 91.9 ± 2.5 *               | 92.8 ± 3.1 *                | 92.1 ± 3.5 *              |                        |                  |
| CadC-R50A                                                                                                        | 8.2 ± 1.7                   | 0.2 ± 0.4                  | 0                           | 0                         |                        |                  |
| <b>% of cells with mCherry-CadC cluster(s)<br/>at pH 5.8 + 10 mM lysine under various conditions</b>             |                             |                            |                             |                           |                        |                  |
| MG1655:<br>0.4% glycerol                                                                                         | 95.4 ± 3.0                  |                            |                             |                           |                        |                  |
| MG1655 $\Delta$ PcadBA                                                                                           | 19.3 ± 3.7                  |                            |                             |                           |                        |                  |
| MG1655 +<br>pBBR1-PcadBA                                                                                         | 92.5 ± 4.6 *                |                            |                             |                           |                        |                  |
| MG1655 +<br>PcadBA_terminus                                                                                      | 98.2 ± 0.4                  |                            |                             |                           |                        |                  |
| MG1655 +<br>chloramphenicol                                                                                      | 0                           |                            |                             |                           |                        |                  |

225 \* multiple cluster per cell.

226

227 **Supplementary Table 2: Summary of trajectory numbers of mNeonGreen-CadC during**  
228 **different conditions in MG1655 wild type.**

229

| <b>mNeonGreen-CadC</b> | <b>pH 5.8 + 10<br/>mM lysine</b> | <b>pH 7.6</b> |
|------------------------|----------------------------------|---------------|
| tracks                 | 114                              | 55            |
| movies                 | 24                               | 25            |
| cells                  | 49                               | 32            |

230

231

**Supplementary Table 3: Bacterial strains and plasmids used in this study**

| Strain or plasmids                                                                            | Relevant genotype or description                                                                                                                                                  | Reference or source |
|-----------------------------------------------------------------------------------------------|-----------------------------------------------------------------------------------------------------------------------------------------------------------------------------------|---------------------|
| <b>Strains</b>                                                                                |                                                                                                                                                                                   |                     |
| <i>E. coli</i> DH5 $\alpha$ pir                                                               | <i>endA1 hsdR17 glnV44 (= supE44) thi-1 recA1 gyrA96 relA1 <math>\phi</math>80' lac<math>\Delta</math>(lacZ)M15 <math>\Delta</math>(lacZYA-argF)U169 zdg-232::Tn10 uidA::pir+</i> | 13                  |
| <i>E. coli</i> WM3064                                                                         | <i>thrB1004 pro thi rpsL hsdS lacZ<math>\Delta</math>M15 RP4-1360 <math>\Delta</math>(araBAD)567 <math>\Delta</math>dapA1341::[erm pir]</i>                                       | 14                  |
| <i>E. coli</i> MG1655                                                                         | K-12 F <sup>-</sup> $\lambda^-$ <i>ilvG<sup>-</sup> rfb-50 rph-1</i>                                                                                                              | 15                  |
| <i>E. coli</i> MG1655 $\Delta$ <i>lysP</i>                                                    | Clean deletion of <i>lysP</i> in MG1655                                                                                                                                           | This work           |
| <i>E. coli</i> MG1655 $\Delta$ <i>P<sub>cadBA</sub></i>                                       | Clean deletion of <i>cadBA</i> promoter region in MG1655                                                                                                                          | This work           |
| <i>E. coli</i> MG1655 $\Delta$ <i>P<sub>cadBA</sub></i><br><i>_P<sub>cadBA</sub></i> terminus | Clean deletion of <i>cadBA</i> promoter region in MG1655 with relocated <i>cadBA</i> promoter region at the terminus                                                              | This work           |
| <i>E. coli</i> MG1655 mNG- <i>cadC</i>                                                        | Clean insertion of N-terminal tagged <i>cadC</i> with <i>mNeonGreen</i> (mNG) in MG1655                                                                                           | This work           |
| LF1                                                                                           | MG1655 <i>rpsL150 P<sub>lac</sub>::rpsL-neo-kan::lacZ<sup><math>\Delta</math>1-100</sup> bp; Kan<sup>R</sup> Strp<sup>S</sup></i>                                                 | 16                  |
| LF1_ $\Delta$ <i>cadC</i> _ <i>cadC</i> <sub>relocated</sub>                                  | MG1655 <i>rpsL150 P<sub>cadC</sub>-cadC::lacZ, Kan<sup>S</sup></i>                                                                                                                | 6                   |
| <b>Plasmids</b>                                                                               |                                                                                                                                                                                   |                     |
| pET16b                                                                                        | Overexpression plasmid for His-tagged proteins, Amp <sup>R</sup>                                                                                                                  | Novagen             |
| pET16b- <i>cadC</i>                                                                           | N-terminal 10His-tagged <i>cadC</i> in pET16b, Amp <sup>R</sup>                                                                                                                   | 17                  |
| pET-mCherry- <i>cadC</i>                                                                      | N-terminal fusion of CadC with mCherry, connected with a 22 aa long linker containing a 10His tag in pET16b, Amp <sup>R</sup>                                                     | This work           |
| pET- <i>cadC</i> -D471N                                                                       | <i>cadC</i> -D471N in pET16b, Amp <sup>R</sup>                                                                                                                                    | 11                  |
| pET-mCherry- <i>cadC</i> -D471N                                                               | <i>cadC</i> -D471N tagged N-terminal with mCherry in pET16b, Amp <sup>R</sup>                                                                                                     | This work           |
| pET- <i>cadC</i> -E30R                                                                        | <i>cadC</i> -E30R in pET16b, Amp <sup>R</sup>                                                                                                                                     | 9                   |
| pET-mCherry- <i>cadC</i> -E30R                                                                | <i>cadC</i> -E30R tagged N-terminal with mCherry in pET16b, Amp <sup>R</sup>                                                                                                      | This work           |
| pET- <i>cadC</i> - $\Delta$ 108-151                                                           | <i>cadC</i> - $\Delta$ 108-151 (deletion of amino acids 108-151) in pET16b, Amp <sup>R</sup>                                                                                      | 12                  |
| pET-mCherry- <i>cadC</i> - $\Delta$ 108-151                                                   | <i>cadC</i> - $\Delta$ 108-151 tagged N-terminal with mCherry in pET16b, Amp <sup>R</sup>                                                                                         | This work           |
| pET- <i>cadC</i> -R265Q/R268Q                                                                 | <i>cadC</i> -R265Q/R268Q in pET16b, Amp <sup>R</sup>                                                                                                                              | 10                  |
| pET-mCherry- <i>cadC</i> -R265Q/R268Q                                                         | <i>cadC</i> -R265Q/R268Q tagged N-terminal with mCherry in pET16b, Amp <sup>R</sup>                                                                                               | This work           |

|                                                   |                                                                                                                                                              |           |
|---------------------------------------------------|--------------------------------------------------------------------------------------------------------------------------------------------------------------|-----------|
| pET- <i>cadC</i> -R50A                            | <i>cadC</i> -R50A in pET16b, Amp <sup>R</sup>                                                                                                                | 9         |
| pET-mCherry- <i>cadC</i> -R50A                    | <i>cadC</i> -R50A tagged N-terminal with mCherry in pET16b, Amp <sup>R</sup>                                                                                 | This work |
| pBR322Cherry                                      | mCherry in pBR322, Amp <sup>R</sup>                                                                                                                          | 2         |
| pET-mCherry                                       | mCherry in pET16b, Amp <sup>R</sup>                                                                                                                          | This work |
| pBBR1-MCS5-TT-RBS- <i>lux</i>                     | <i>luxCDABE</i> and terminators lambda <i>T0 rrnB1 T1</i> cloned into pBBR1-MCS5 for plasmid-based transcriptional fusions, Gm <sup>R</sup>                  | 3         |
| pBBR1-MCS5-P <sub><i>cadBA</i></sub> - <i>lux</i> | <i>cadBA</i> promoter controlling expression of <i>luxCDABE</i> , in pBBR1-MCS5-TT-RBS- <i>lux</i> , Gm <sup>R</sup>                                         | This work |
| pNTPS138-R6KT                                     | <i>mobRP4</i> <sup>+</sup> <i>ori</i> -R6K <i>sacB</i> ; suicide plasmid for in-frame deletions, Km <sup>R</sup>                                             | 18        |
| pNTPS138-R6KT-Δ <i>lysP</i>                       | pNPTS-138-R6KT-derived suicide plasmid for in-frame deletion of <i>lysP</i> in MG1655, Km <sup>R</sup>                                                       | This work |
| pNTPS138-R6KT- <i>mNG-cadC</i>                    | pNPTS-138-R6KT-derived suicide plasmid for in-frame insertion of <i>mNeonGreen</i> (mNG) in front of <i>cadC</i> in MG1655 strains, Km <sup>R</sup>          | This work |
| pNTPS138-R6KT-P <sub><i>cadBA</i></sub> _terminus | pNPTS-138-R6KT-derived suicide plasmid for insertion of <i>cadBA</i> promoter region at terminus in MG1655ΔP <sub><i>cadBA</i></sub> strain, Km <sup>R</sup> | This work |

234

235

236

## 237 References

- 238 1. Gibson, D. G. *et al.* Enzymatic assembly of DNA molecules up to several hundred  
239 kilobases. *Nat. Meth.* **6**, 343–345 (2009).
- 240 2. Munch, A., Stingl, L., Jung, K. & Heermann, R. *Photothabdus luminescens* genes  
241 induced upon insect infection. *BMC Genomics* **9**, 229 (2008).
- 242 3. Gödeke, J., Heun, M., Bubendorfer, S., Paul, K. & Thormann, K. M. Roles of two  
243 *Shewanella oneidensis* MR-1 extracellular endonucleases. *Appl. Environ.*  
244 *Microbiol.* **77**, 5342–5351 (2011).
- 245 4. Schenk, K. *et al.* Rapid turnover of DnaA at replication origin regions contributes  
246 to initiation control of DNA replication. *PLoS Genet* **13**, e1006561–32 (2017).
- 247 5. Fritz, G. *et al.* Induction kinetics of a conditional pH stress response system in  
248 *Escherichia coli*. *J. Mol. Biol.* **393**, 272–286 (2009).

- 249 6. Buchner, S. G. Strukturelle und funktionale Analyse der Effektor-domäne des pH-  
250 abhängigen Einkomponentensystems CadC in *Escherichia coli*. *Dissertation LMU*  
251 1–136 (2015).
- 252 7. Laemmli, U. K. Cleavage of structural proteins during the assembly of the head of  
253 bacteriophage T4. *Nature* **227**, 680–685 (1970).
- 254 8. Schneider, C. A., Rasband, W. S. & Eliceiri, K. W. NIH Image to ImageJ: 25 years  
255 of image analysis. *Nat. Meth.* **9**, 671–675 (2012).
- 256 9. Schlundt, A. *et al.* Structure-function analysis of the DNA-binding domain of a  
257 transmembrane transcriptional activator. *Sci. Rep.* **7**, 1–16 (2017).
- 258 10. Rauschmeier, M., Schüppel, V., Tetsch, L. & Jung, K. New insights into the  
259 interplay between the lysine transporter LysP and the pH sensor CadC in  
260 *Escherichia coli*. *J. Mol. Biol.* **426**, 215–229 (2014).
- 261 11. Haneburger, I., Eichinger, A., Skerra, A. & Jung, K. New insights into the signaling  
262 mechanism of the pH-responsive, membrane-integrated transcriptional activator  
263 CadC of *Escherichia coli*. *J. Biol. Chem.* **286**, 10681–10689 (2011).
- 264 12. Buchner, S., Schlundt, A., Lassak, J., Sattler, M. & Jung, K. Structural and  
265 functional analysis of the signal transducing linker in the pH-responsive one  
266 component system CadC of *Escherichia coli*. *J. Mol. Biol.* **457**, 2548–2561 (2015).
- 267 13. Miller, V. L. & Mekalanos, J. J. A novel suicide vector and its use in construction  
268 of insertion mutations: osmoregulation of outer membrane proteins and virulence  
269 determinants in *Vibrio cholerae* requires *toxR*. *J. Bacteriol.* **170**, 2575–2583  
270 (1988).
- 271 14. Dehio, C. & Meyer, M. Maintenance of broad-host-range incompatibility group P  
272 and group Q plasmids and transposition of Tn5 in *Bartonella henselae* following  
273 conjugal plasmid transfer from *Escherichia coli*. *J. Bacteriol.* **179**, 538–540  
274 (1997).
- 275 15. Blattner, F. R. *et al.* The complete genome sequence of *Escherichia coli* K-12.  
276 *Science* **277**, 1453–1462 (1997).
- 277 16. Fried, L., Lassak, J. & Jung, K. A comprehensive toolbox for the rapid construction  
278 of *lacZ* fusion reporters. *J. Microbiol. Methods* **91**, 537–543 (2012).
- 279 17. Küper, C. & Jung, K. CadC-mediated activation of the *cadBA* promoter in  
280 *Escherichia coli*. *J. Mol. Microbiol. Biotechnol.* **10**, 26–39 (2005).
- 281 18. Lassak, J., Henche, A.-L., Binnenkade, L. & Thormann, K. M. ArcS, the cognate  
282 sensor kinase in an atypical Arc system of *Shewanella oneidensis* MR-1. *Appl.*  
283 *Environ. Microbiol.* **76**, 3263–3274 (2010).
